# Supplementary material for: Development and Validation of 3‐Year Atrial Fibrillation Prediction Models Using Electronic Health Record With or Without Standardized Electrocardiogram Diagnosis and a Performance Comparison Among Models
Source: PubMed Central journal article supplement (PMC9238645; doi:10.1161/jaha.121.024045), 2022-06-14
Supplement: JAH3-11-e024045-s001.pdf [file JAH3-11-e024045-s001.pdf]

# **SUPPLEMENTAL MATERIAL**

**Table S1. Univariate Cox regression analysis of clinical risk factors and ECG diagnosis for 3-year new-onset AF prediction in the derivation cohort.**

| Variable                | HR (95 % CI)       | P Value |
|-------------------------|--------------------|---------|
| Age, years              | 1.06 (1.05–1.07)   | <.001   |
| Male                    | 1.44 (1.13–1.83)   | 0.003   |
| Current smoking         | 1.14 (0.84–1.55)   | 0.405   |
| Alcohol drinking        | 0.90 (0.67–1.22)   | 0.505   |
| Systolic BP, mmHg       | 1.02 (1.02–1.03)   | <.001   |
| Diastolic BP, mmHg      | 1.02 (1.01–1.03)   | <.001   |
| Hypertension            | 3.06 (2.41–3.89)   | <.001   |
| Diabetes Mellitus       | 2.32 (1.83–2.94)   | <.001   |
| Insulin                 | 1.82 (1.08–3.07)   | 0.024   |
| Dyslipidemia            | 2.51 (1.97–3.18)   | <.001   |
| Thyroid disease         | 1.07 (0.48–2.40)   | 0.874   |
| COPD                    | 3.78 (0.53–26.94)  | 0.184   |
| Heart failure           | 10.11 (6.41–15.95) | <.001   |
| MV stenosis             | 13.46 (3.35–53.99) | <.001   |
| VHD except MV stenosis  | 8.19 (3.38–19.83)  | <.001   |
| Coronary artery disease | 2.81 (2.02–3.91)   | <.001   |

|                                     |                     |       |
|-------------------------------------|---------------------|-------|
| Stroke                              | 4.09 (2.97–5.63)    | <.001 |
| Peripheral arterial disease         | 1.03 (0.14–7.31)    | 0.980 |
| Creatinine, mg/dL                   | 1.20 (1.13–1.26)    | <.001 |
| ECG                                 |                     |       |
| Aberrant conduction complex         | 5.65 (1.40–22.69)   | 0.015 |
| Atrial premature complex            | 7.43 (4.17–13.25)   | <.001 |
| AV block                            | 4.45 (2.76–7.17)    | <.001 |
| AV block (1st degree)               | 3.89 (2.35–6.45)    | <.001 |
| AV block (2:1)                      | 14.95 (2.10–106.55) | 0.007 |
| AV block (2nd degree)               | 12.91 (1.81–91.95)  | 0.011 |
| AV dissociation                     | 44.29 (6.23–315.00) | <.001 |
| Early repolarization                | 0.41 (0.06–2.94)    | 0.377 |
| Fusion beat                         | 22.52 (9.30–54.53)  | <.001 |
| Intra-ventricular conduction defect | 6.62 (1.65–26.61)   | 0.008 |
| LAFB                                | 3.66 (1.36–9.82)    | 0.010 |
| LBBB                                | 6.98 (2.24–21.76)   | 0.001 |
| Left axis deviation                 | 2.08 (1.10–3.90)    | 0.023 |
| LVH                                 | 2.21 (1.31–3.72)    | 0.003 |

|                                        |                    |       |
|----------------------------------------|--------------------|-------|
| Myocardial infarction                  | 3.99 (0.99–16.03)  | 0.051 |
| Myocardial infarction (anterior)       | 3.99 (1.49–10.71)  | 0.006 |
| Myocardial infarction (antero-lateral) | 3.56 (0.50–25.33)  | 0.205 |
| Myocardial infarction (antero-septal)  | 1.41 (0.20–10.01)  | 0.733 |
| Myocardial infarction (inferior)       | 0.68 (0.22–2.12)   | 0.507 |
| Myocardial infarction (lateral)        | 2.51 (0.63–10.10)  | 0.194 |
| Myocardial infarction (posterior)      | 1.82 (0.26–12.99)  | 0.549 |
| Myocardial infarction (septal)         | 2.24 (0.72–6.96)   | 0.165 |
| Myocardial ischemia (anterior)         | 2.49 (1.23–5.04)   | 0.011 |
| Myocardial ischemia (inferior)         | 2.00 (0.64–6.22)   | 0.234 |
| Myocardial ischemia (lateral)          | 1.98 (0.98–4.01)   | 0.056 |
| Normal sinus rhythm                    | 0.48 (0.36–0.63)   | <.001 |
| P wave (left atrial enlargement)       | 3.00 (1.12–8.04)   | 0.029 |
| PR interval (short)                    | 0.96 (0.13–6.80)   | 0.964 |
| QT interval (prolonged)                | 2.67 (1.59–4.49)   | <.001 |
| R wave (abnormal)                      | 9.03 (6.89–348.74) | <.001 |
| RBBB                                   | 1.17 (0.43–3.13)   | 0.761 |
| RBBB (incomplete)                      | 2.98 (1.11–7.99)   | 0.030 |

|                                    |                     |       |
|------------------------------------|---------------------|-------|
| Right axis deviation               | 0.67 (0.21–2.08)    | 0.487 |
| rSr pattern in V1 and V2           | 2.41 (0.34–17.16)   | 0.380 |
| Sinus arrhythmia                   | 1.88 (0.97–3.66)    | 0.062 |
| Sinus arrhythmia (marked)          | 10.28 (4.86–21.78)  | <.001 |
| Sinus rhythm                       | 3.55 (2.54–4.97)    | <.001 |
| Sinus rhythm (bradycardia)         | 1.14 (0.74–1.76)    | 0.554 |
| Sinus rhythm (tachycardia)         | 1.62 (0.86–3.04)    | 0.135 |
| ST segment change                  | 2.76 (0.69–11.08)   | 0.153 |
| ST segment depression              | 5.84 (0.82–41.54)   | 0.078 |
| ST segment elevation               | 1.90 (0.61–5.94)    | 0.268 |
| ST segment elevation (lateral)     | 32.21 (4.52–229.51) | 0.001 |
| ST-T abnormality (non-specific)    | 2.18 (1.08–4.40)    | 0.030 |
| Supraventricular premature complex | 17.21 (8.52–34.76)  | <.001 |
| T wave (abnormal)                  | 1.63 (1.04–2.54)    | 0.032 |
| Ventricular premature complex      | 5.48 (3.07–9.77)    | <.001 |
| Voltage (decreased)                | 2.76 (1.03–7.42)    | 0.044 |
| Wide QRS complex                   | 11.98 (6.16–23.27)  | <.001 |

ECG diagnoses for which statistics were not calculated in univariate analysis were excluded from the table. BP, blood pressure; COPD, chronic obstructive pulmonary disease; MV, mitral valve; VHD, valvular heart disease; LAFB, left anterior fascicular block; LBBB, left bundle branch block; LVH, left ventricular hypertrophy; RBBB, right bundle branch block; HR, hazard ratio; CI, confidence interval.

**Table S2. Baseline comparison between missing value population and non-missing value population.**

|                             | Non-missing<br>(n = 51,167) | Missing<br>(n = 342,796) | P Value |
|-----------------------------|-----------------------------|--------------------------|---------|
| Clinical characteristics    |                             |                          |         |
| Age, years                  | 50.56 ± 21.77               | 44.23 ± 22.04            | <.001   |
| Male                        | 25,910 (50.64)              | 159,397 (46.5)           | <.001   |
| Current smoker              | 8,284 (16.19)               | 980 (0.29)               | <.001   |
| Alcohol drinking            | 11,124 (21.74)              | 1,353 (0.39)             | <.001   |
| Hypertension                | 12,859 (25.13)              | 22,118 (6.45)            | <.001   |
| Diabetes mellitus           | 17,489 (34.18)              | 22,707 (6.62)            | <.001   |
| Dyslipidemia                | 13,324 (26.04)              | 23,390 (6.82)            | <.001   |
| Chronic kidney disease      | 942 (1.84)                  | 2,543 (0.74)             | <.001   |
| Thyroid disease             | 1,035 (2.02)                | 4,387 (1.28)             | <.001   |
| COPD                        | 48 (0.09)                   | 116 (0.03)               | <.001   |
| Heart failure               | 417 (0.81)                  | 636 (0.19)               | <.001   |
| VHD                         |                             |                          |         |
| MV stenosis                 | 22 (0.04)                   | 79 (0.02)                | <.001   |
| Other VHD                   | 128 (0.25)                  | 341 (0.1)                |         |
| Coronary artery disease     | 3,157 (6.17)                | 7,665 (2.24)             | <.001   |
| Stroke                      | 2,423 (4.74)                | 3,239 (0.94)             | <.001   |
| Peripheral arterial disease | 194 (0.38)                  | 1,063 (0.31)             | 0.010   |
| ECG diagnosis (top 20)      |                             |                          |         |
| Normal sinus rhythm         | 19,537 (38.18)              | 22,517 (6.57)            | <.001   |
| Sinus rhythm (bradycardia)  | 3,676 (7.18)                | 5,512 (1.61)             | <.001   |

|                                  |              |              |       |
|----------------------------------|--------------|--------------|-------|
| T wave (abnormal)                | 2,478 (4.84) | 1,970 (0.57) | <.001 |
| Sinus rhythm                     | 2,430 (4.75) | 2,841 (0.83) | <.001 |
| LVH                              | 1,288 (2.52) | 1,418 (0.41) | <.001 |
| Sinus rhythm (tachycardia)       | 1,174 (2.29) | 594 (0.17)   | <.001 |
| QT interval (prolonged)          | 1,048 (2.05) | 609 (0.18)   | <.001 |
| Sinus arrhythmia                 | 944 (1.84)   | 1,292 (0.38) | <.001 |
| Left axis deviation              | 901 (1.76)   | 981 (0.29)   | <.001 |
| Right axis deviation             | 869 (1.7)    | 1,109 (0.32) | <.001 |
| AV block (1st degree)            | 838 (1.64)   | 1,024 (0.3)  | <.001 |
| AV block                         | 825 (1.61)   | 1,049 (0.31) | <.001 |
| Myocardial infarction (inferior) | 799 (1.56)   | 800 (0.23)   | <.001 |
| Myocardial ischemia (lateral)    | 762 (1.49)   | 555 (0.16)   | <.001 |
| ST-T abnormality (non-specific)  | 652 (1.27)   | 578 (0.17)   | <.001 |
| RBBB                             | 636 (1.24)   | 722 (0.21)   | <.001 |
| Myocardial ischemia (anterior)   | 607 (1.19)   | 395 (0.12)   | <.001 |
| Early repolarization             | 477 (0.93)   | 684 (0.2)    | <.001 |
| Ventricular premature complex    | 442 (0.86)   | 816 (0.24)   | <.001 |
| ST segment elevation             | 334 (0.65)   | 380 (0.11)   | <.001 |

Values are presented as n (%) or mean  $\pm$  standard deviation. AV, atrioventricular; BP, blood pressure; COPD, chronic obstructive pulmonary disease; LVH, left ventricular hypertrophy; MV, mitral valve; VHD, valvular heart disease; RBBB, right bundle branch block; ECG, electrocardiogram
